# Supplementary material for: Ionic liquid assisted nanofabrication of ferromagnetic Co-doped La–Ce ferrites
Source: Royal Society of Chemistry journal article supplement (doi:10.1039/c5ra17174a), 2015-01-01
Supplement: c5ra17174a1.pdf [file c5ra17174a1.pdf]

## Supplementary Information (SI)

### Ionic Liquid Assisted Nanofabrication of Ferromagnetic Co-doped La-Ce Ferrites

Preet Shikha, Tejwant Singh Kang\*, B.S. Randhawa\*

*Department of Chemistry, UGC-Centre for advanced Studies-I, Guru Nanak Dev University,  
Amritsar-143005, India.*

*\*Corresponding author. Tel.: +91 183 2258802-Ext-3207; Fax: +91 183 225820.*

*Email address: [balwinderrandhawa@gmail.com](mailto:balwinderrandhawa@gmail.com), [tejwantsinghkang@gmail.com](mailto:tejwantsinghkang@gmail.com)*

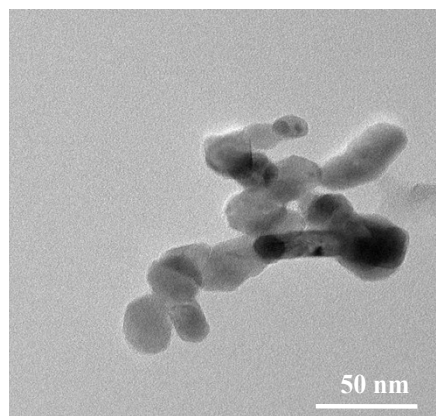

Fig.S1. TEM image of LaFeO<sub>3</sub> NPs synthesized by ILS (50 mM) assisted hydrothermal route.

**Table S1.** Particle size and Morphology of undoped La-Ce ferrite NPs as a function of concentration of ILS.

| Conc. of ILS (mM) | Average crystallite size (nm) | Particle size from TEM (nm) | Morphology of NPs                  |
|-------------------|-------------------------------|-----------------------------|------------------------------------|
| 0                 | 22                            | 25-30                       | Aggregated spherical               |
| 10                | 20.2                          | 14-22                       | Spherical in sheet like network    |
| 50                | 23.1                          | 15-25                       | Interconnecting rods and spherical |
| 200               | 24.2                          | 27-34                       | Rods and spherical                 |
